# Supplementary material for: Tracheal stenosis in prolonged mechanically ventilated patients: prevalence, risk factors, and bronchoscopic management
Source: PubMed Central journal article supplement (PMC8740413; doi:10.1186/s12890-022-01821-6), 2022-01-06
Supplement: 12890_2022_1821_MOESM1_ESM.pdf [file 12890_2022_1821_MOESM1_ESM.pdf]

# **Tracheal stenosis in prolonged mechanically ventilated patients: prevalence, risk factors, and bronchoscopic management**

Alessandro Ghiani, MD; Konstantinos Tsitouras, MD; Joanna Paderewska, MD; Dieter Munker, MD; Swenja Walcher, RT; Claus Neurohr, MD; and Nikolaus Kneidinger, MD

## **Additional file 1**

- 1. Figure S1 (Page 2)**
- 2. Figure S2 (Page 2)**
- 3. Figure S3 (Page 3)**
- 4. Table S1 (Page 4)**
- 5. Table S2 (Page 4)**
- 6. References (Page 5)**

**Figure S1:** Myer-Cotton classification of subglottic tracheal stenoses [1]

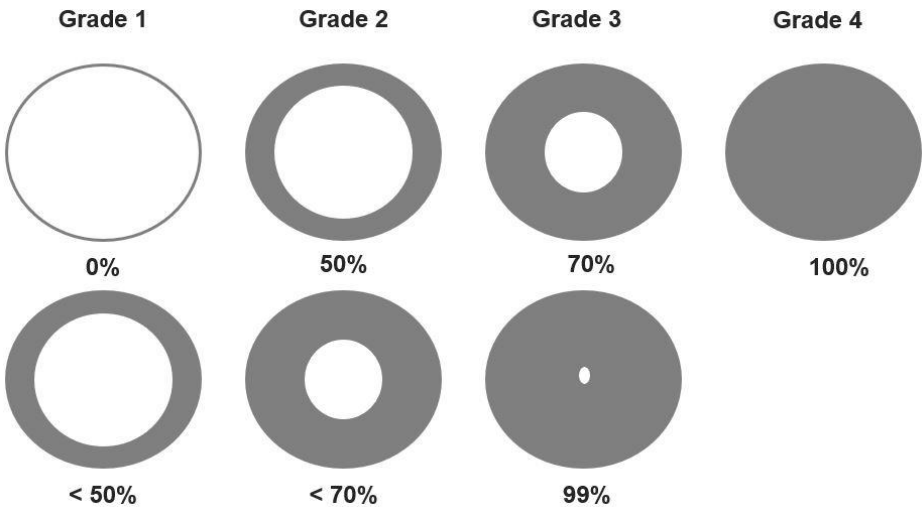

**Figure S2:** Tracheal stenoses following percutaneous and surgical tracheostomies

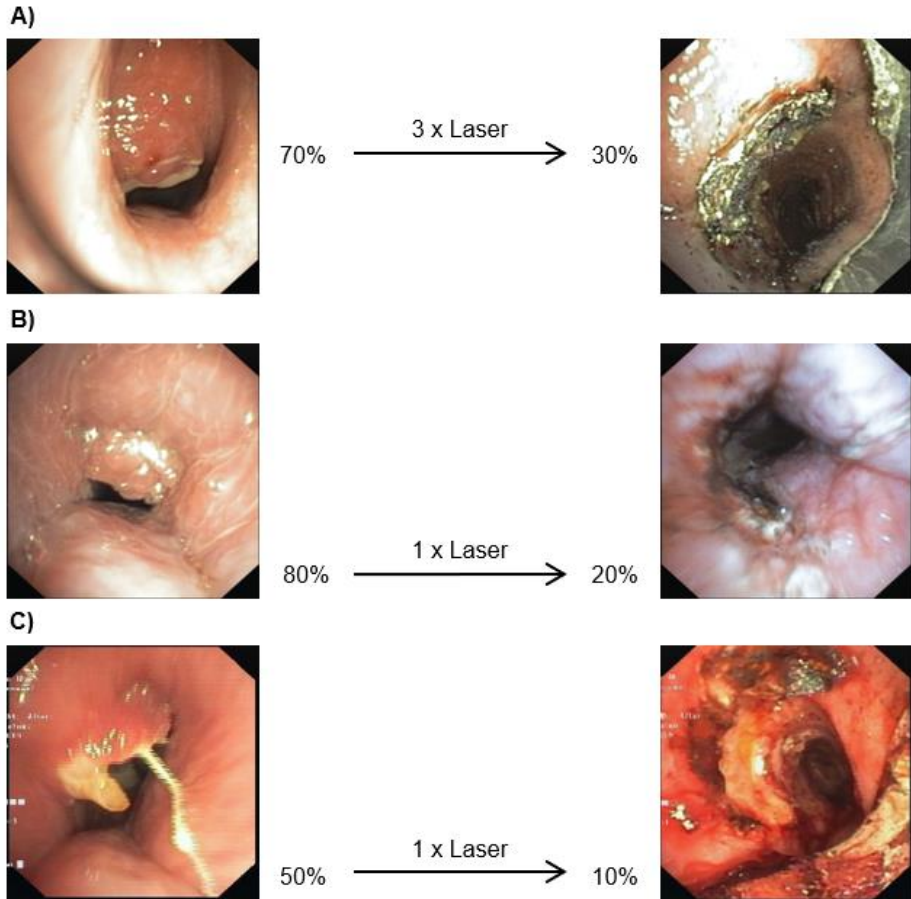

**Legend**

A) Subglottic stenosis (PT), B) Upper tracheal stenosis (ST), C) Upper tracheal stenosis with a tracheal cartilage ring fracture (PT); each case reported with the percentage of area stenosis before and after interventional bronchoscopy using Nd:YAG photocoagulation.

*Abbreviations:* PT, percutaneous tracheostomy; ST, surgical tracheostomy

**Figure S3:** Different types of tracheostomy tubes used during weaning

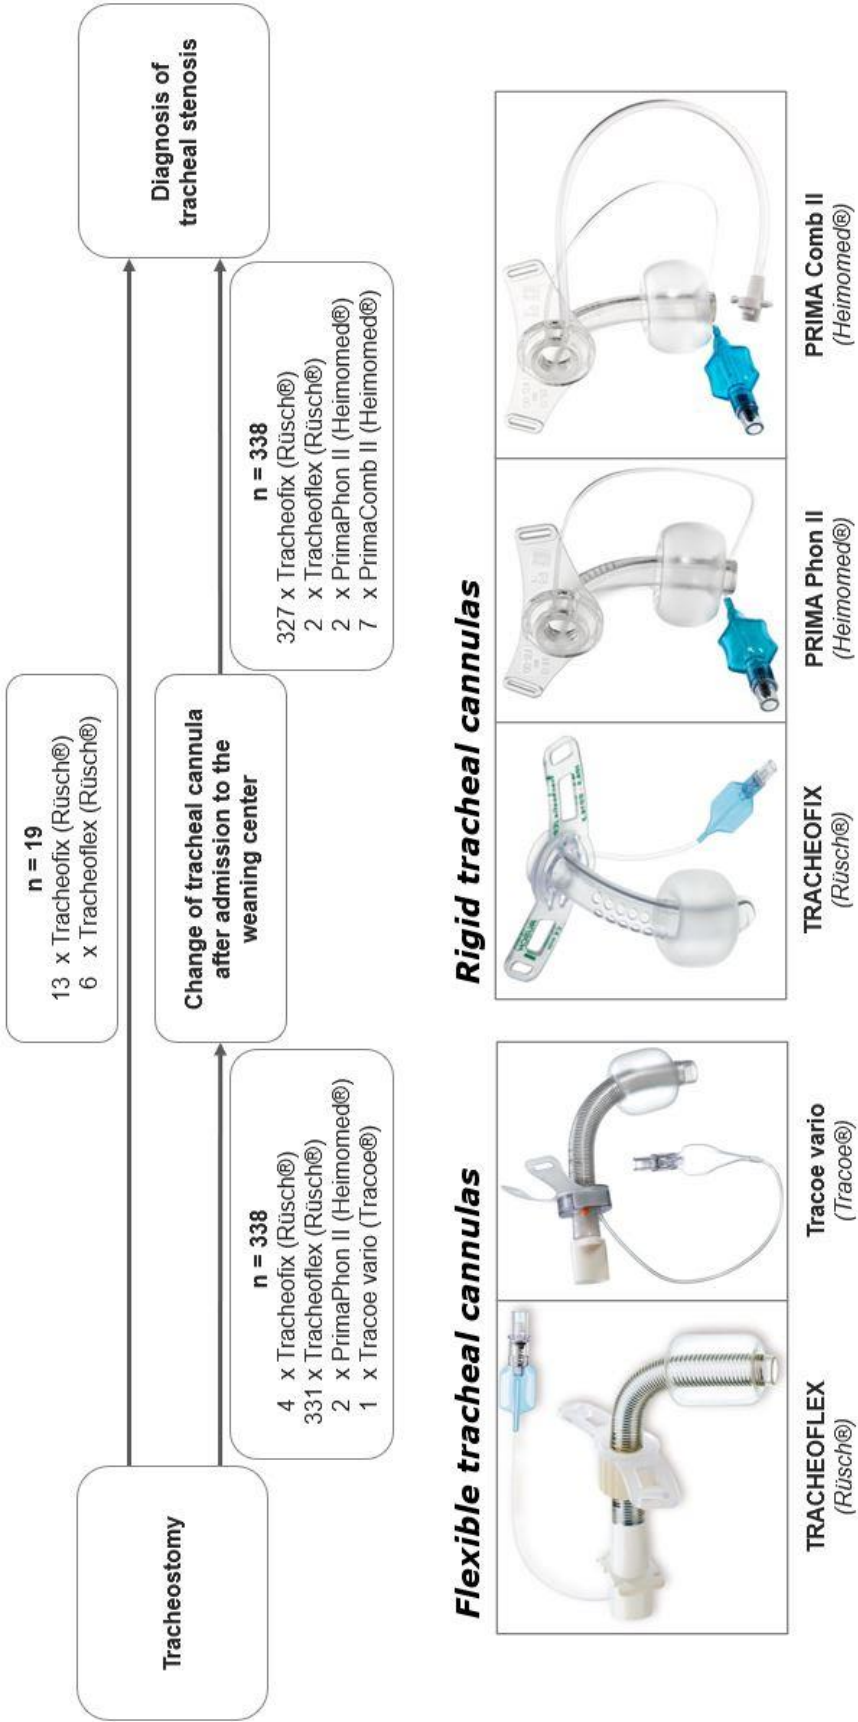

**Table S1:** Variables associated with tracheal stenosis – Results of univariable and multivariable binary logistic regression analysis

| Variables                                        | Univariable analysis |                 | Multivariable analysis |                 |
|--------------------------------------------------|----------------------|-----------------|------------------------|-----------------|
|                                                  | OR (95%CI)           | P value         | OR (95%CI)             | P value         |
| Age                                              | 1.01 (0.99–1.03)     | 0.181           | –                      | n.s.            |
| Male gender                                      | 0.85 (0.54–1.34)     | 0.490           | –                      | n.s.            |
| Albumin                                          | 1.44 (0.92–2.25)     | 0.110           | –                      | n.s.            |
| Obesity (defined as BMI > 30 kg/m <sup>2</sup> ) | 1.94 (1.19–3.16)     | <b>&lt;0.01</b> | 2.16 (1.29–3.63)       | <b>&lt;0.01</b> |
| Diabetes mellitus                                | 1.56 (0.97–2.51)     | 0.064           | –                      | n.s.            |
| Interstitial lung diseases                       | 0.38 (0.13–1.15)     | 0.087           | –                      | n.s.            |
| Surgery                                          | 0.70 (0.40–1.21)     | 0.198           | –                      | n.s.            |
| Steroids                                         | 0.58 (0.26–1.32)     | 0.192           | –                      | n.s.            |
| Immunosuppression                                | 0.65 (0.35–1.19)     | 0.164           | –                      | n.s.            |
| Cannula outer diameter (mm)                      | 0.94 (0.76–1.18)     | 0.607           | –                      | n.s.            |
| Cannulation duration (days)                      | 1.00 (0.99–1.01)     | 0.941           | –                      | n.s.            |
| Percutaneous tracheostomy                        | 1.72 (0.98–3.00)     | 0.059           | 2.02 (1.12–3.66)       | <b>0.020</b>    |
| Cricothyrotomy status                            | 5.53 (2.07–14.8)     | <b>&lt;0.01</b> | 5.35 (1.96–14.6)       | <b>&lt;0.01</b> |

**Legend**

The regression model variables include demographics, baseline clinical characteristics, tracheal cannula features, tracheostomy technique, and cricothyrotomy status.

*Abbreviations:* OR, odds ratio; 95%CI, 95% confidence interval; n.s., not significant; BMI, body mass index

**Table S2:** Multivariable regression model [2]

| Log-odds                         | L = - 1.63 + (0.77 * obesity) + (0.70 * PT) + (1.68 * cricothyrotomy) |                  |                      |       |
|----------------------------------|-----------------------------------------------------------------------|------------------|----------------------|-------|
| OR (95%CI); P value              | obesity                                                               | 2.16 (1.29–3.63) |                      | <0.01 |
|                                  | PT                                                                    | 2.02 (1.12–3.66) |                      | 0.020 |
|                                  | cricothyrotomy                                                        | 5.35 (1.96–14.6) |                      | <0.01 |
| Hosmer & Lemeshow                | 0.902                                                                 |                  |                      |       |
| Nagelkerke R <sup>2</sup>        | 0.095                                                                 |                  |                      |       |
| AUROC (95%CI)                    | 0.63 (0.57 – 0.68)                                                    |                  |                      |       |
| 2 x 2 table                      | TP<br>14                                                              | FP<br>6          |                      |       |
|                                  | FN<br>100                                                             | TN<br>237        |                      |       |
| Metrics from 2 x 2 table (95%CI) | Sensitivity                                                           | 12% (7–20)       | PLR                  | 5.0   |
|                                  | Specificity                                                           | 98% (95–99)      | NLR                  | 0.9   |
|                                  | PPV                                                                   | 70% (48–86)      | DOR                  | 6     |
|                                  | NPV                                                                   | 70% (69–72)      | F <sub>1</sub> score | 0.20  |
|                                  | Accuracy                                                              | 70% (65–75)      | MCC                  | 0.20  |

**Legend**

*Abbreviations:* L, log-odds; PT, percutaneous tracheostomy; OR, odds ratio; 95%CI, 95% confidence interval; AUROC, area under the receiver operating characteristic curve; TP, true positive; FP, false positive; FN, false negative; TN, true positive; PPV, positive predictive value; NPV, negative predictive value; PLR, positive likelihood ratio; NLR, negative likelihood ratio; DOR, diagnostic odds ratio; MCC, Matthews correlations coefficient [3]

## References

1. Myer CM, O'Connor DM, Cotton RT. Proposed grading system for subglottic stenosis based on endotracheal tube size. *Ann Otol Rhinol Laryngol* 1994;103: 319–323
2. Leisman DE, Harhay MO, Lederer DJ, et al.. Development and reporting of prediction models: Guidance for authors from editors of respiratory, sleep, and critical care journals. *Crit Care Med* 2020;48:623–33
3. Chicco D, Jurman G. The advantages of the Matthews correlation coefficient (MCC) over F1 score and accuracy in binary classification evaluation. *BMC Genomics* 2020;21:6
